# Supplementary material
Source: PubMed Central journal article supplement (PMC4135398)
Supplement: NIHMS620468-supplement-Snapshots_of_movies.pdf [file NIHMS620468-supplement-Snapshots_of_movies.pdf]

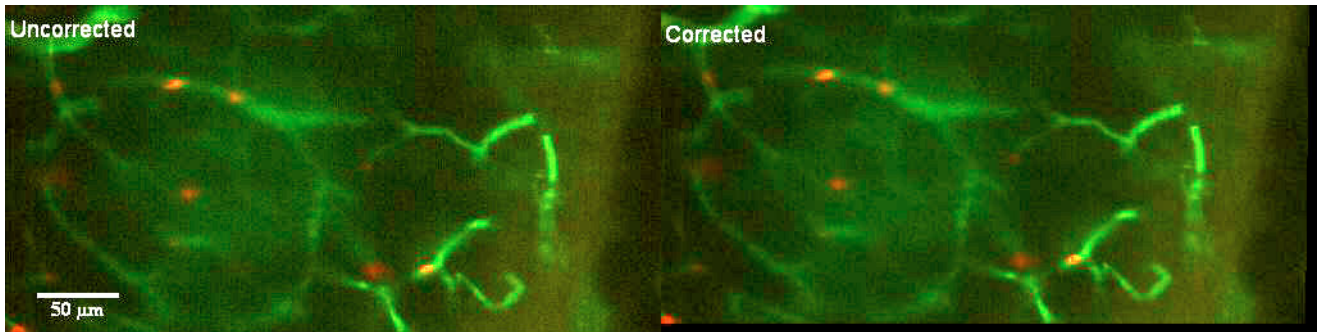

**Video 1.** Dataset 2 with “most” movement, 600 frames, and  $z_0 = 30.925 \mu\text{m}$  shows the motion correction for the original  $t$ -stack using the deformation field computed from the framework.

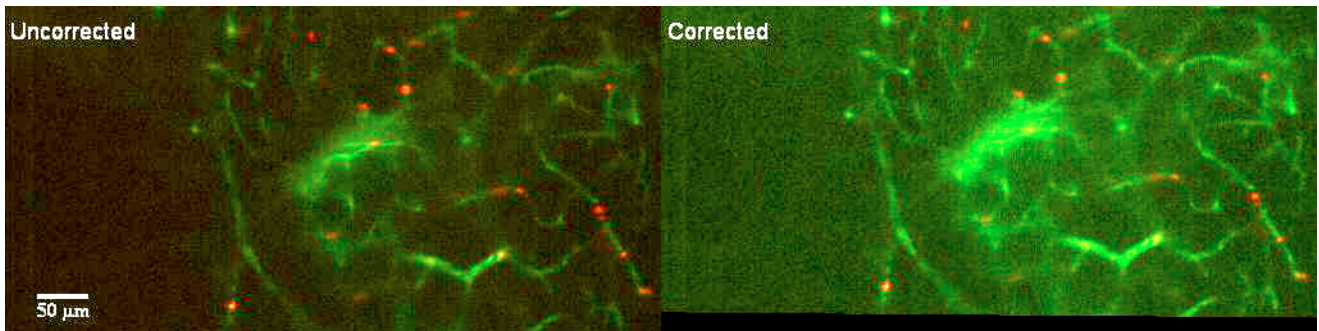

**Video 2.** Dataset 3 with “most” movement, 400 frames, and  $z_0 = 30.425 \mu\text{m}$  shows the motion correction for the original  $t$ -stack using the deformation field computed from the framework.

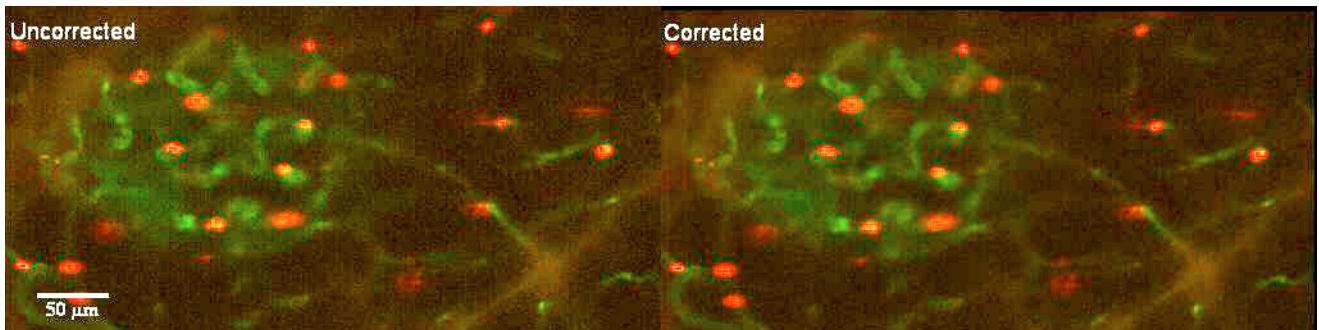

**Video 3.** Dataset 8 with “moderate” movement, 450 frames, and  $z_0 = 29.300 \mu\text{m}$  shows the motion correction for the original  $t$ -stack using the deformation field computed from the framework.

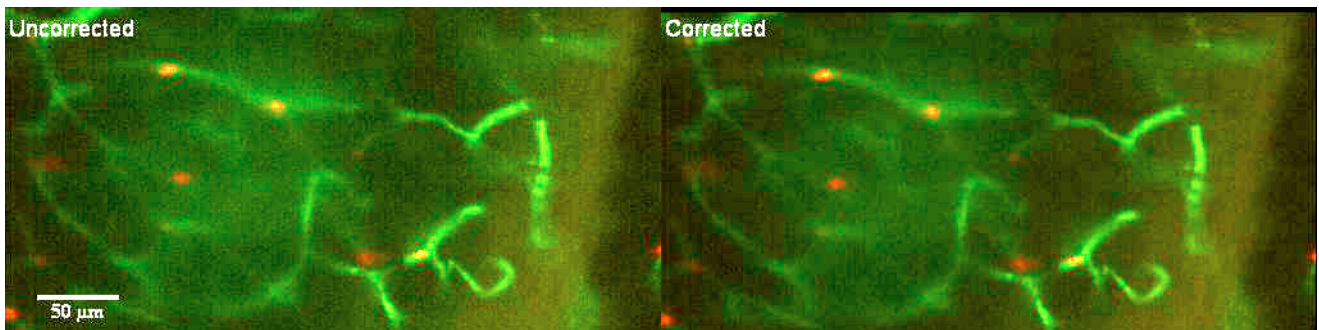

**Video 4.** Dataset  $10^1$  with “most” movement, 75 frames, and  $z_0 = 30.425 \mu\text{m}$  shows the motion correction for the original  $t$ -stack with manually manipulated brightness to simulate  $\text{Ca}^{2+}$  imaging using the deformation field computed from the framework. A part of Dataset 2, Video 1, was used to create Dataset  $10^1$ .
